# Supplementary material for: Cardioluminescence in Transgenic Zebrafish Larvae: A Calcium Imaging Tool to Study Drug Effects and Pathological Modeling
Source: MDPI journal article supplement (doi:10.3390/biomedicines9101294), 2021-09-22
Supplement: s1 [file s1]

# Cardioluminescence in transgenic zebrafish larvae: a calcium imaging tool to study drug effects and pathological modeling

Manuel Vicente, Jussep Salgado-Almario, Michelle M. Collins, Antonio Martínez-Sielva, Masafumi Minoshima, Kazuya Kikuchi, Beatriz Domingo and Juan Llopis

## Supplementary figures:

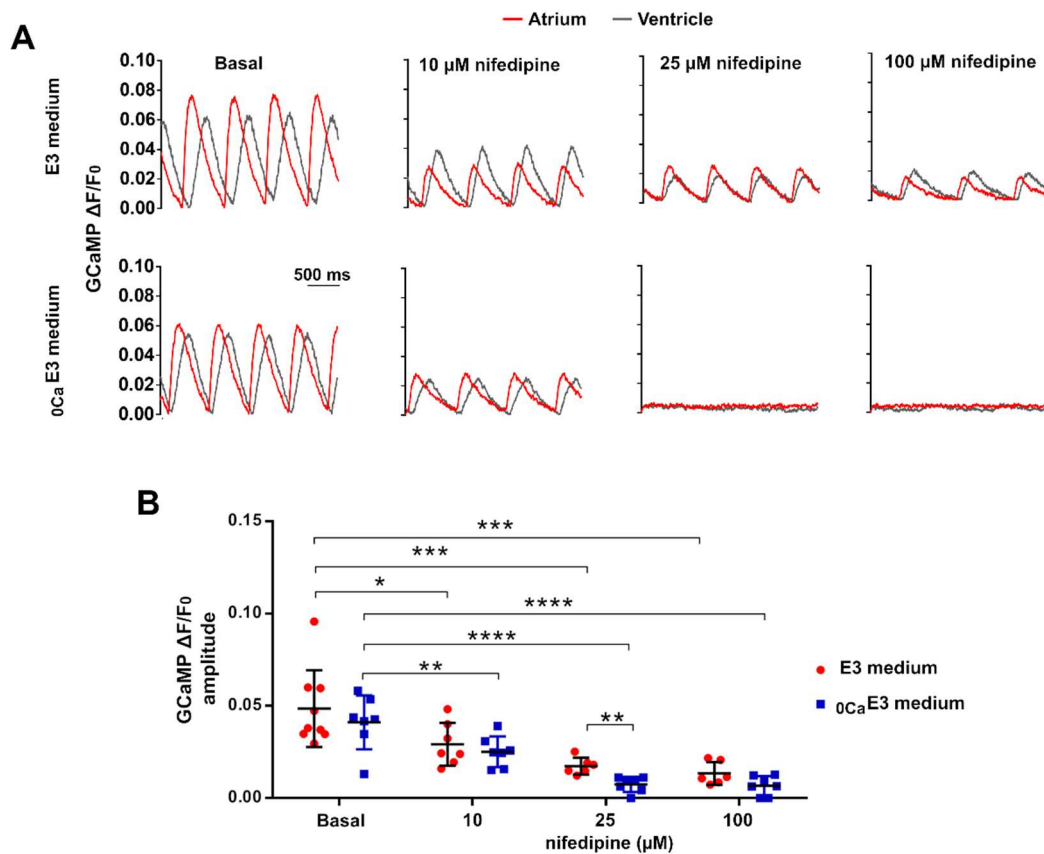

**Figure S1.** Dose-response of nifedipine on  $\text{Ca}^{2+}$  transients measured with GCaMP. Three concentrations of nifedipine were tested in the absence or presence of  $\text{Ca}^{2+}$  in E3 medium in 3 dpf *Tg(myf17:GCaMP)<sup>s878</sup>* embryos. **(A)** Representative  $\text{Ca}^{2+}$  transients with 10, 25 and 100  $\mu$ M nifedipine for 30 min in complete E3 medium (upper panel) or in zero  $\text{Ca}^{2+}$  E3 ( $\text{E3}_{0\text{Ca}}$ ) medium (lower panel). The fluorescence images were acquired at 200 Hz. **(B)** Dose-response of nifedipine on ventricular  $\text{Ca}^{2+}$  transient amplitude in both media. A two-way ANOVA with Holm-Sidak *post hoc* correction for multiple comparisons and multiple *t*-tests was used. Data are shown as the mean  $\pm$  SD. E3 medium (basal  $n=9$ , 10  $\mu$ M  $n=7$ , 25  $\mu$ M  $n=6$ , 100  $\mu$ M  $n=6$ ) and  $\text{E3}_{0\text{Ca}}$  medium (basal  $n=7$ , 10  $\mu$ M  $n=7$ , 25  $\mu$ M  $n=7$ , 100  $\mu$ M  $n=7$ ). \*  $p < 0.05$ , \*\*  $p < 0.01$ , \*\*\*  $p < 0.001$ , \*\*\*\*  $p < 0.0001$ .

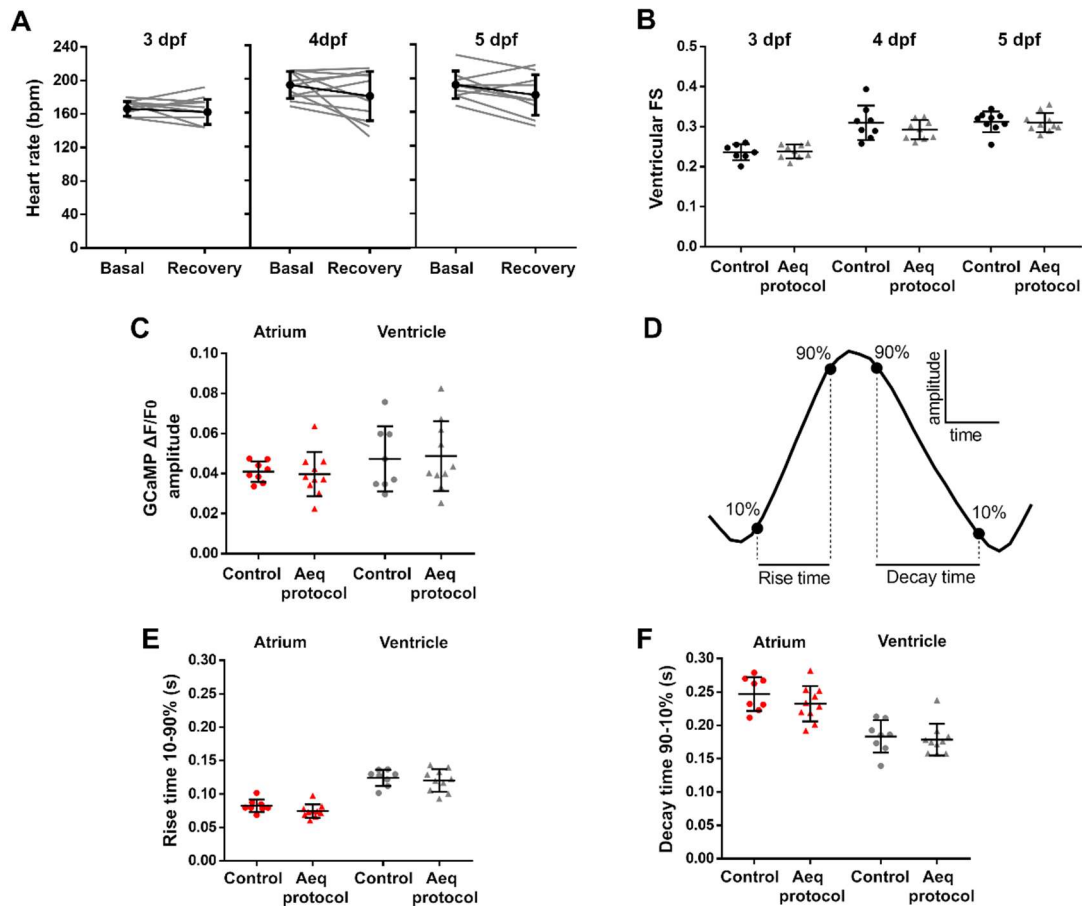

**Figure S2.** Restoration of the heart mechanical function and the  $Ca^{2+}$  transients after the recovery period of the aequorin reconstitution protocol. **(A)** HR during the basal and recovery periods in 3, 4 and 5 dpf *Tg(myI7:GA)* zebrafish embryos. A two-tailed paired *t*-test was used. Data are shown as the mean  $\pm$  SD ( $n=11$  for 3 and 4 dpf;  $n=10$  for 5 dpf). The temperature was held at 27.5°C. **(B)** Ventricular fractional shortening (FS), measured with the major diameter, from untreated embryos (control group) and the aequorin reconstitution group in 3, 4 and 5 dpf *Tg(myI7:GA)* embryos. A two-tailed unpaired *t*-test was used. Data are shown as the mean  $\pm$  SD (control  $n=7$  for 3 dpf,  $n=8$  for 4 dpf and  $n=9$  for 5 dpf; Aeq protocol  $n=9$  for 3 and 4 dpf and  $n=10$  for 5 dpf). **(C)**  $Ca^{2+}$  transient amplitude from control and Aeq reconstitution protocol 3 dpf *Tg(myI7:GCaMP)<sup>s878</sup>* larvae. **(D)** Scheme of a  $Ca^{2+}$  transient showing the 10-90% rise time and 90-10% decay time. **(E)** Rise time and **(F)** decay time in atrium and ventricle from untreated embryos (control) and Aeq protocol groups. A two-tailed unpaired *t*-test was used. Data are shown as the mean  $\pm$  SD ( $n=8$  for control and  $n=10$  for Aeq protocol groups for C, E and F). No statistical differences were found in any of the groups ( $p > 0.05$ ).

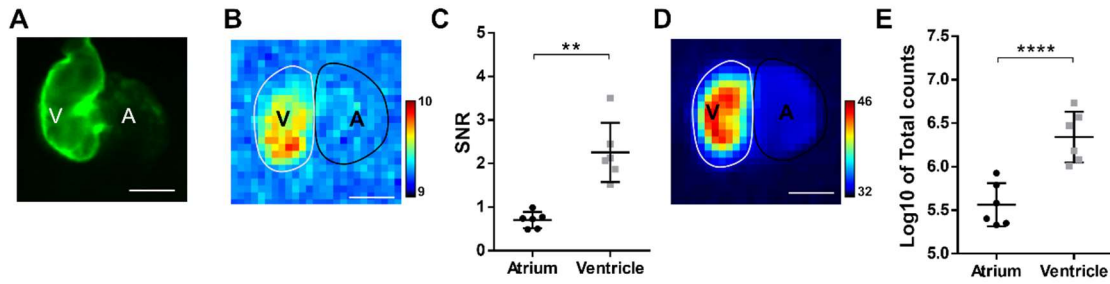

**Figure S3.** Luminescence in the atrium and the ventricle of 3 dpf *Tg(myI7:GA)* embryos subjected to the aequorin reconstitution protocol. **(A)** Image of GFP fluorescence in the heart showing the atrium (A) and ventricle (V). **(B)** Image of integrated luminescence for 1 min. Images were acquired at 9 Hz. **(C)** SNR of the atrium and the ventricle. A two-tailed paired *t*-test was used. Data are shown as mean  $\pm$  SD ( $n=6$ ). **(D)** Image of the luminescence integrated during the whole experiment. Images were acquired at 9 Hz. **(E)** Total counts released in the atrium and in the ventricle. A two-tailed paired *t*-test was used. Data are shown as mean  $\pm$  SD ( $n=6$ ). *Diacetyl h*-CTZ was used for reconstitution. Scale bar in (A), (B) and (D) represents 100  $\mu$ m and the color scale indicates RLU. \*\*  $p < 0.01$ , \*\*\*\*  $p < 0.0001$ .

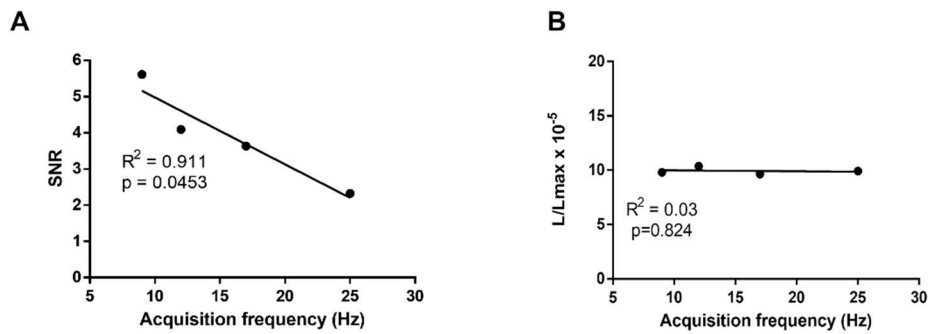

**Figure S4.** Dependency of SNR and  $L/L_{max}$  on the image acquisition frequency. Correlation between the image acquisition frequency (9, 12, 17 and 25 Hz) and the SNR **(A)** and the  $L/L_{max}$  **(B)** in a representative 3 dpf *Tg(myI7:GA)* zebrafish embryo reconstituted with *diacetyl h*-CTZ.

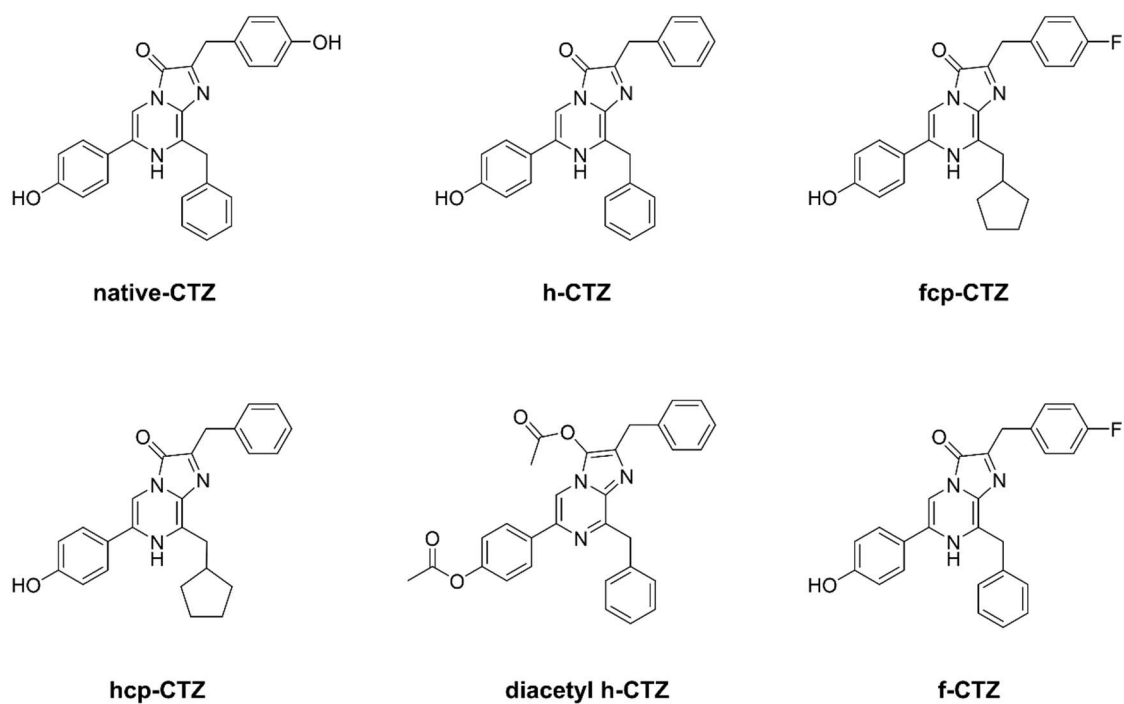

**Figure S5.** Structure of the coelenterazines used in this study.

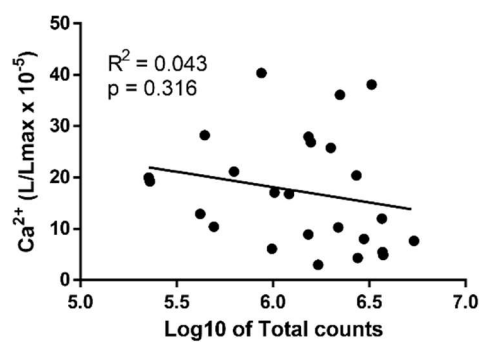

**Figure S6.** Correlation of the basal L/Lmax values versus the total counts in 3 dpf *Tg(myl7:GA)* zebrafish embryos. These experiments were performed using *diacetyl h-CTZ*. Image acquisition rate was 9 Hz. A linear regression test was used (n=25).

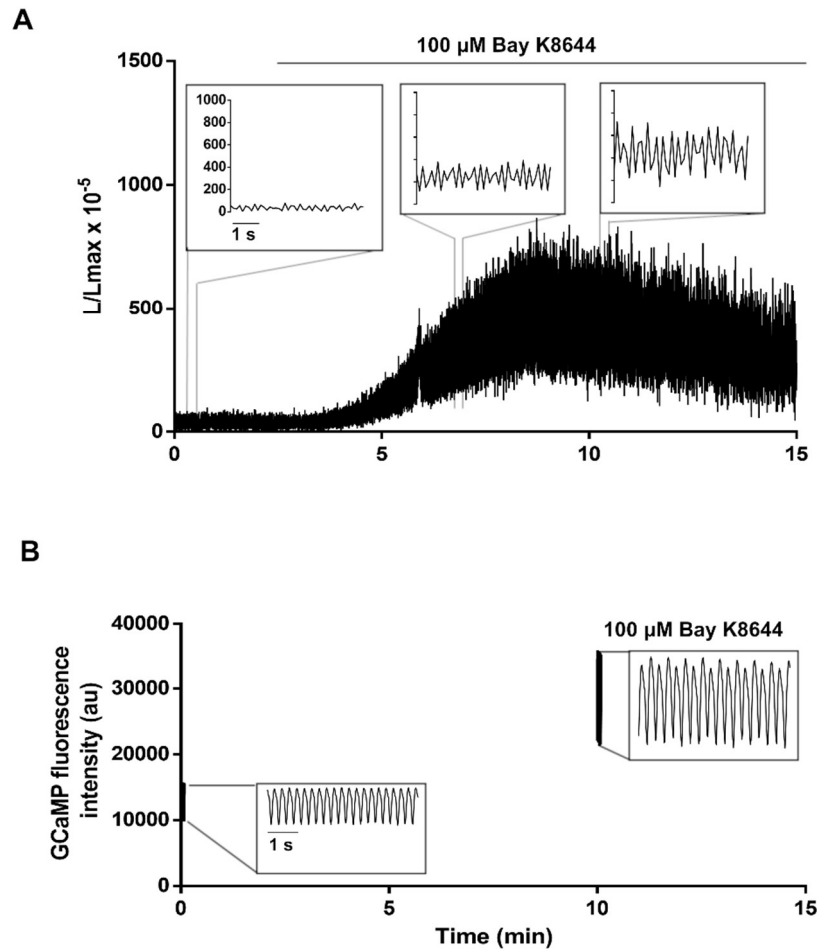

**Figure S7.** Comparison of the effect of Bay K8644 (100  $\mu$ M) in 3 dpf GA expressing embryos and by fluorescence imaging in 3 dpf GCaMP expressing embryos under similar conditions (heart beating was not stopped). **(A)** Luminescence in the ventricle after addition of Bay K8644. The insets expand 5 s recording periods. Images were acquired at 9 Hz. *Diacetyl h*-CTZ was used for reconstitution. **(B)** GCaMP fluorescence traces obtained from images acquired during 5 s at the indicated times before and after addition of Bay K8644. The insets expand the time scale to resolve the individual transients.
